# Supplementary material for: Synthesis and properties of the derivatives of triphenylamine and 1,8-naphthalimide with the olefinic linkages between chromophores
Source: Royal Society of Chemistry journal article supplement (doi:10.1039/c5ra24820e), 2015-12-23
Supplement: c5ra24820e1.pdf [file c5ra24820e1.pdf]

## Supporting information

### Synthesis and properties of the derivatives of triphenylamine and 1,8-naphthalimide with the olefinic linkages between chromophores

Dalius Gudeika,<sup>a</sup> Gjergji Sini,<sup>b</sup> Vygintas Jankauskas,<sup>c</sup> Galyna Sych,<sup>a</sup> Juozas V. Grazulevicius<sup>a,\*</sup>

<sup>a</sup> Department of Polymer Chemistry and Technology, Kaunas University of Technology, Radvilenu pl. 19, LT-50254 Kaunas, Lithuania Fax: +37037 300152; tel: +37037 300193; e-mail: juozas.grazulevicius@ktu.lt

<sup>b</sup> Laboratoire de Physicochimie des Polymères et des Interfaces, EA 2528 Université de Cergy-Pontoise, 5 mail Gay-Lussac, 95031 Cergy-Pontoise

<sup>c</sup> Department of Solid State Electronics, Vilnius University, Sauletekio aleja 9, LT-10222 Vilnius, Lithuania

## Contents

|                                                                                                                                                                                                                                                                                                                                                                                                                                                                                                                                                                                                                                         |   |
|-----------------------------------------------------------------------------------------------------------------------------------------------------------------------------------------------------------------------------------------------------------------------------------------------------------------------------------------------------------------------------------------------------------------------------------------------------------------------------------------------------------------------------------------------------------------------------------------------------------------------------------------|---|
| <b>Figure S1.</b> <sup>1</sup> H NMR spectra of compound <b>4</b> (a) and compound <b>5</b> (b). .....                                                                                                                                                                                                                                                                                                                                                                                                                                                                                                                                  | 2 |
| <b>Figure S2.</b> <sup>13</sup> C NMR spectra of compound <b>4</b> (a) and compound <b>5</b> (b). .....                                                                                                                                                                                                                                                                                                                                                                                                                                                                                                                                 | 3 |
| <b>Figure S3.</b> Theoretical absorption spectra of model compounds (a) <b>M4</b> and (b) <b>M5</b> , along with their comparison in (c). The spectra are obtained at the TD-B3LYP/6-31G(d,p) level in gas phase. B3LYP (and other functionals containing low % of hartree-fock exchange) is known to badly perform for the description of the charge transfer states (important red-shift). It is however sufficient for the comparison of the absorption spectra across the series of compounds <b>4</b> , <b>5</b> . The theoretical absorption bands were obtained by considering a band half-width at half-maximum of 0.2 eV. .... | 5 |
| <b>Figure S4.</b> Selected choice of dimers constructed from the model compound <b>M4</b> , obtained at the ωB97XD/6-31G(d,p) level in gas phase. The dimer indicated as „naphthalimide-over-bridge“, for instance, corresponds to naphthalimide moiety over the butadiene one. ....                                                                                                                                                                                                                                                                                                                                                    | 6 |

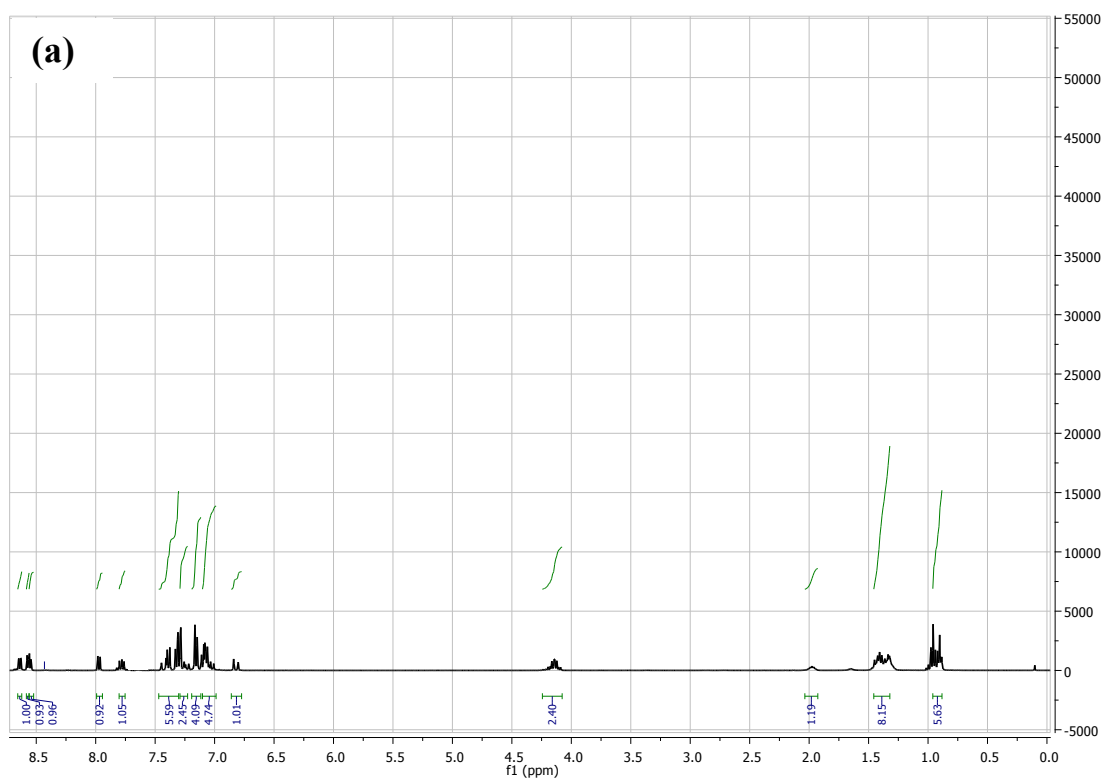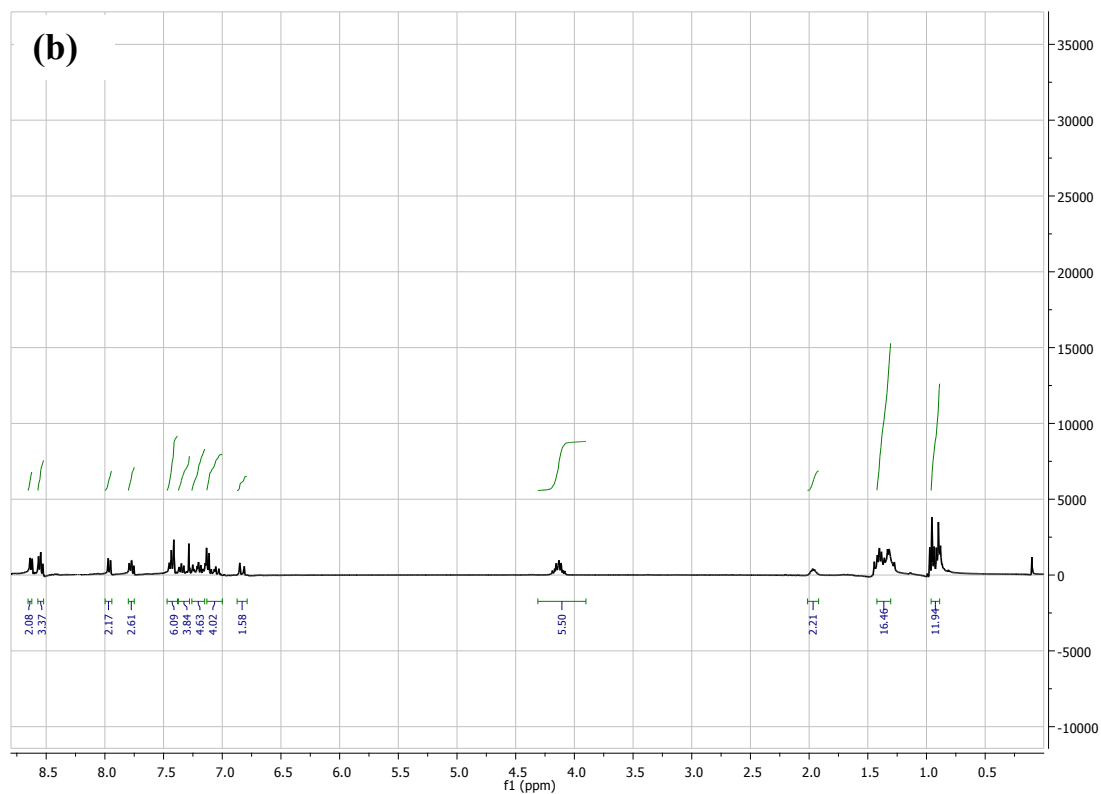

**Figure S1.**  $^1\text{H}$  NMR spectra of compound **4** (a) and compound **5** (b).

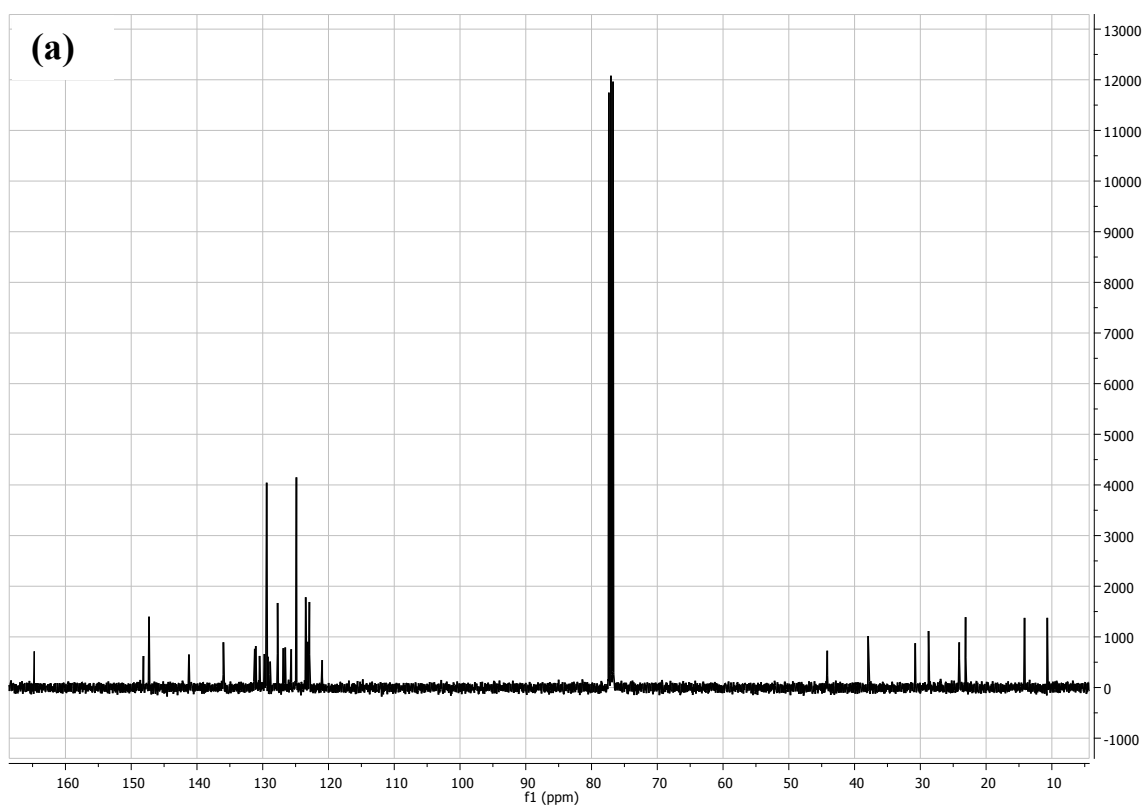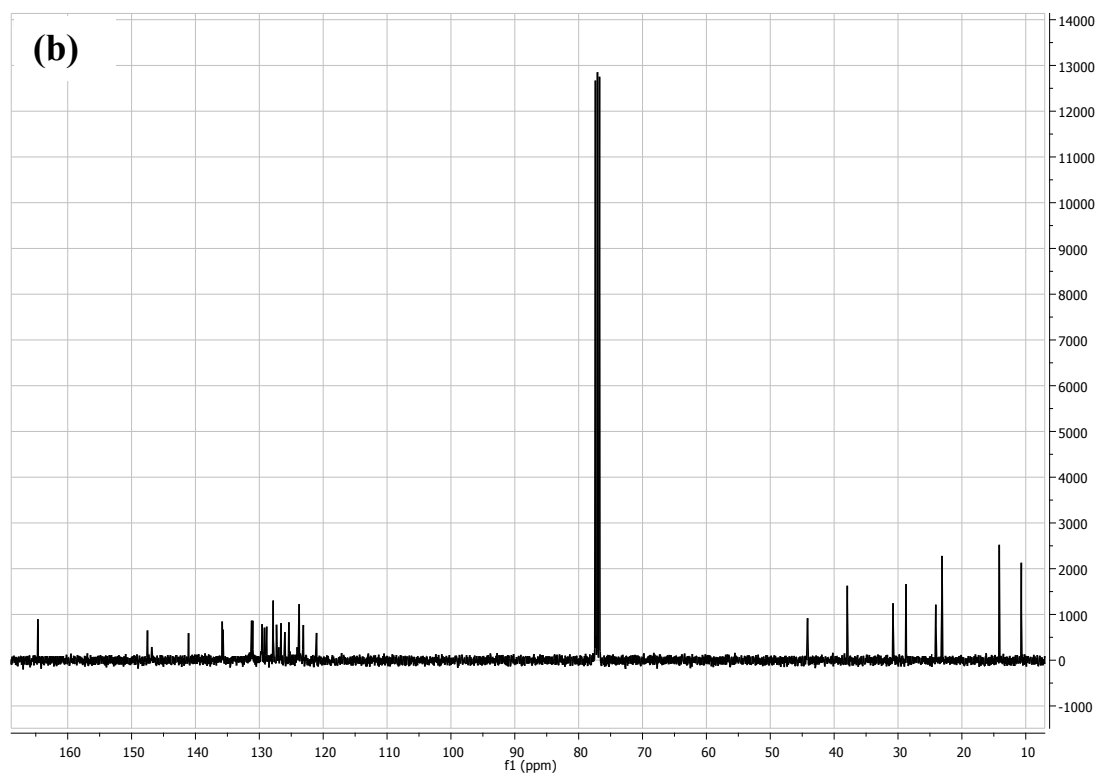

**Figure S2.**  $^{13}\text{C}$  NMR spectra of compound 4 (a) and compound 5 (b).

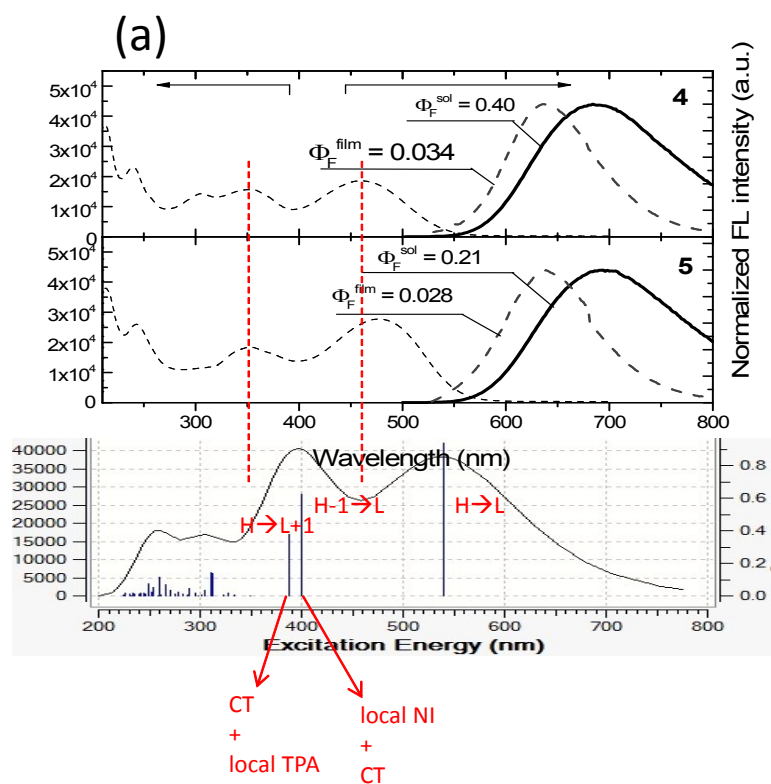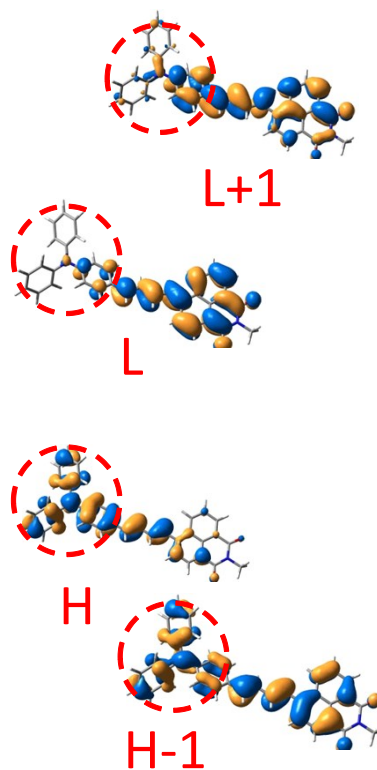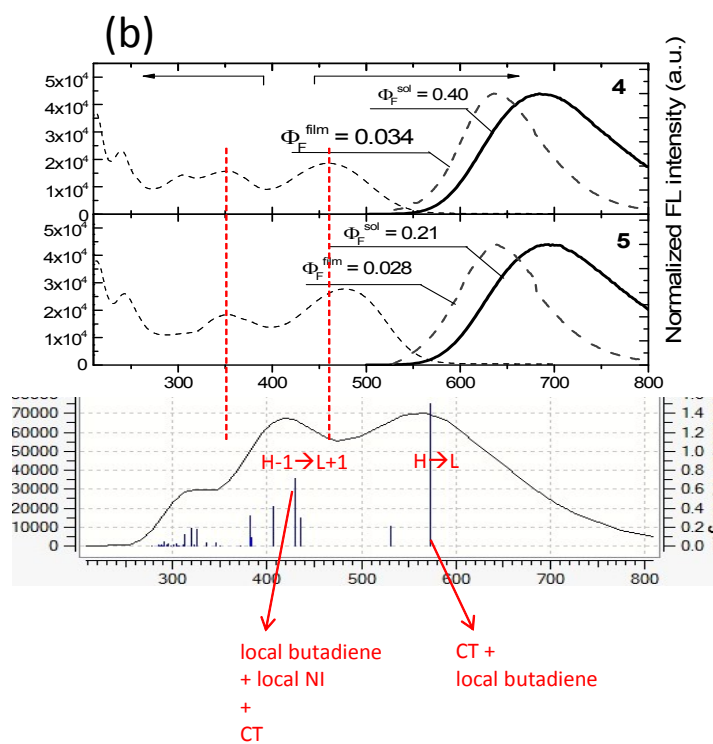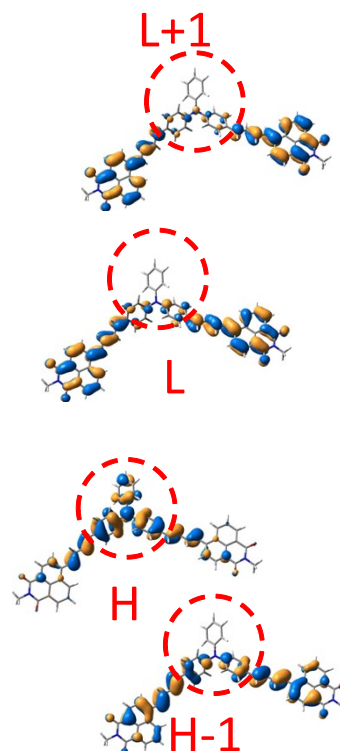

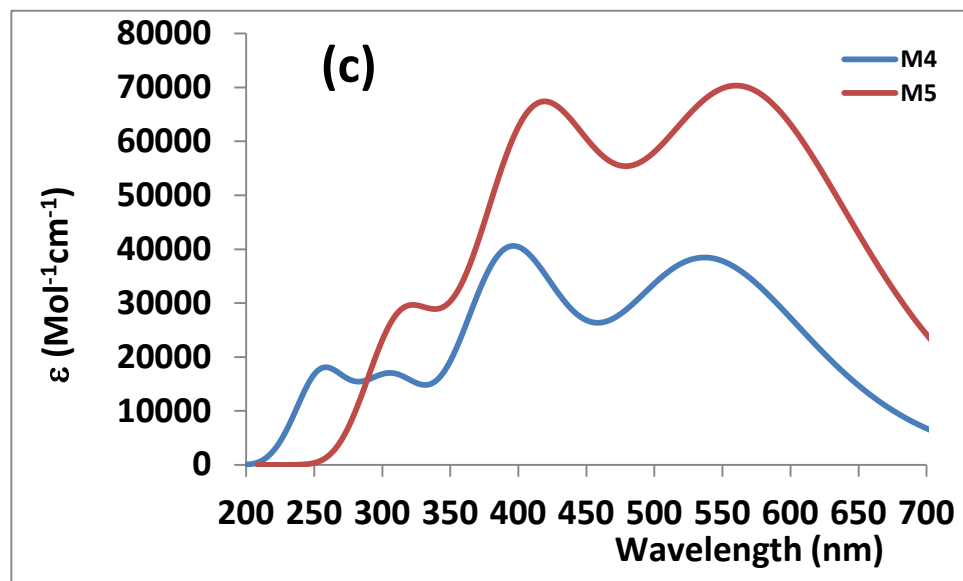

**Figure S3.** Theoretical absorption spectra of model compounds (a) **M4** and (b) **M5**, along with their comparison in (c). The spectra are obtained at the TD-B3LYP/6-31G(d,p) level in gas phase. B3LYP (and other functionals containing low % of hartree-fock exchange) is known to badly perform for the description of the charge transfer states (important red-shift). It is however sufficient for the comparison of the absorption spectra across the series of compounds **4**, **5**. The theoretical absorption bands were obtained by considering a band half-width at half-maximum of 0.2 eV.

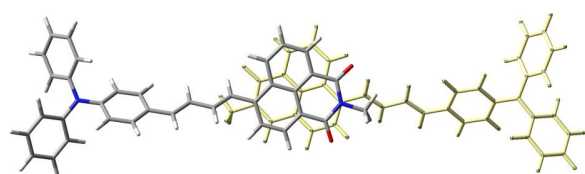

**M4-dimer-NI-over-NI**

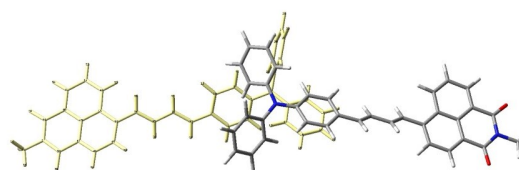

**M4-dimer-TPA-over-TPA**

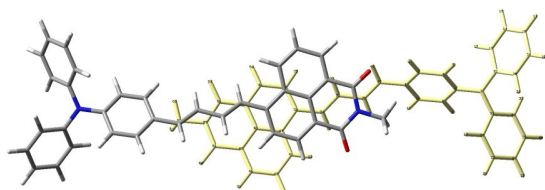

**M4-dimer-NI-over-bridge**

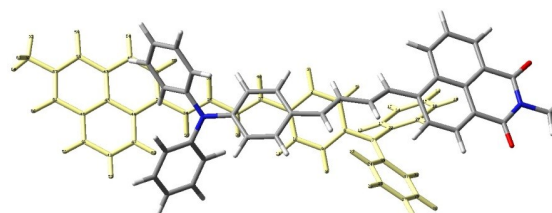

**M4-dimer-TPA-over-bridge**

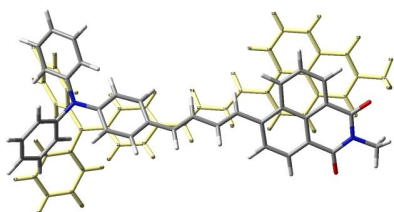

**M4-dimer-cofacial**

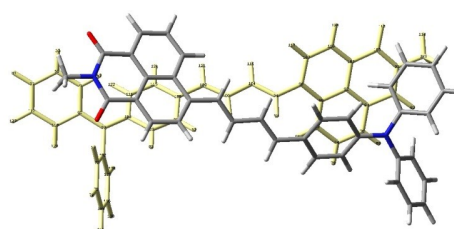

**M4-dimer-NI-over-TPA**

**Figure S4.** Selected choice of dimers constructed from the model compound **M4**, obtained at the  $\omega$ B97XD/6-31G(d,p) level in gas phase. The dimer indicated as „naphthalimide-over-bridge“, for instance, corresponds to naphthalimide moiety over the butadiene one.
